# Supplementary material for: Viral infection and transmission in a large, well-traced outbreak caused by the SARS-CoV-2 Delta variant
Source: PubMed Central journal article supplement (PMC8786931; doi:10.1038/s41467-022-28089-y), 2022-01-24
Supplement: 41467_2022_28089_MOESM1_ESM.pdf [file 41467_2022_28089_MOESM1_ESM.pdf]

## Supplementary information for:

### **Viral infection and transmission in a large, well-traced outbreak caused by the SARS-CoV-2 Delta variant**

Baisheng Li<sup>1,2#</sup>, Aiping Deng<sup>1,2#</sup>, Kuibiao Li<sup>3#</sup>, Yao Hu<sup>1,2#</sup>, Zhencui Li<sup>1,2#</sup>, Yaling Shi<sup>4#</sup>, Qianling Xiong<sup>1,2,5</sup>, Zhe Liu<sup>1,2,5</sup>, Qianfang Guo<sup>1,2</sup>, Lirong Zou<sup>1,2</sup>, Huan Zhang<sup>1,2</sup>, Meng Zhang<sup>1,2</sup>, Fangzhu Ouyang<sup>1,2</sup>, Juan Su<sup>1,2</sup>, Wenzhe Su<sup>3</sup>, Jing Xu<sup>1,2</sup>, Huifang Lin<sup>1,2,5</sup>, Jing Sun<sup>1,2,5</sup>, Jinju Peng<sup>1,2,5</sup>, Huiming Jiang<sup>1,2,5</sup>, Pingping Zhou<sup>1,2,5</sup>, Ting Hu<sup>1,2</sup>, Min Luo<sup>1,2</sup>, Yingtao Zhang<sup>1,2</sup>, Huanying Zheng<sup>1,2</sup>, Jianpeng Xiao<sup>1,2,5</sup>, Tao Liu<sup>1,2,5</sup>, Mingkai Tan<sup>4</sup>, Rongfei Che<sup>1,2</sup>, Hanri Zeng<sup>1,2</sup>, Zhonghua Zheng<sup>1,2</sup>, Yushi Huang<sup>1,2</sup>, Jianxiang Yu<sup>1,2</sup>, Lina Yi<sup>1,2,5</sup>, Jie Wu<sup>1,2</sup>, Jingdiao Chen<sup>1,2</sup>, Haojie Zhong<sup>1,2</sup>, Xiaoling Deng<sup>1,2</sup>, Min Kang<sup>1,2</sup>, Oliver G. Pybus<sup>6</sup>, Matthew Hall<sup>7</sup>, Katrina A. Lythgoe<sup>7</sup>, Yan Li<sup>1,2\*</sup>, Jun Yuan<sup>3\*</sup>, Jianfeng He<sup>1,2\*</sup>, Jing Lu<sup>1,2,5\*</sup>

<sup>1</sup>Guangdong Provincial Center for Disease Control and Prevention, Guangzhou, Guangdong, China

<sup>2</sup>Guangdong Workstation for Emerging Infectious Disease Control and Prevention, Chinese Academy of Medical Sciences, Guangzhou, Guangdong, China

<sup>3</sup>Guangzhou Center for Disease Control and Prevention, Guangzhou, Guangdong, China

<sup>4</sup>Guangzhou 8<sup>th</sup> People's Hospital, Guangzhou, Guangdong, China

<sup>5</sup>Guangdong Provincial Institution of Public Health, Guangzhou, Guangdong, China

<sup>6</sup>Department of Zoology, University of Oxford, Oxford OX1 3SZ, UK

<sup>7</sup>Big Data Institute, Nuffield Department of Medicine, University of Oxford, Old Road Campus, Oxford OX3 7LF, UK

# These authors contributed equally: Baisheng Li, Aiping Deng, Kuibiao Li, Yao Hu, Zhencui Li, Yaling Shi

\*Corresponding authors:

Yan Li, 13580581074@126.com

Jun Yuan, yuanjuncom@163.com

Jianfeng He, hjf@vip.sina.com

Jing Lu, Jimlu0331@163.com

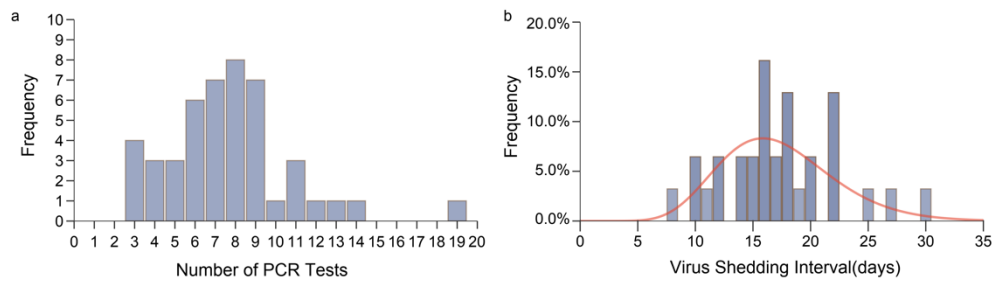

**Supplementary Figure 1.** Statistical description of epidemiological information. **a** Distribution of frequency of PCR+ test from quarantined individuals. **b** Distribution of virus shedding interval (from first PCR+ test to first PCR- test). Detail testing information was included in supplementary data.

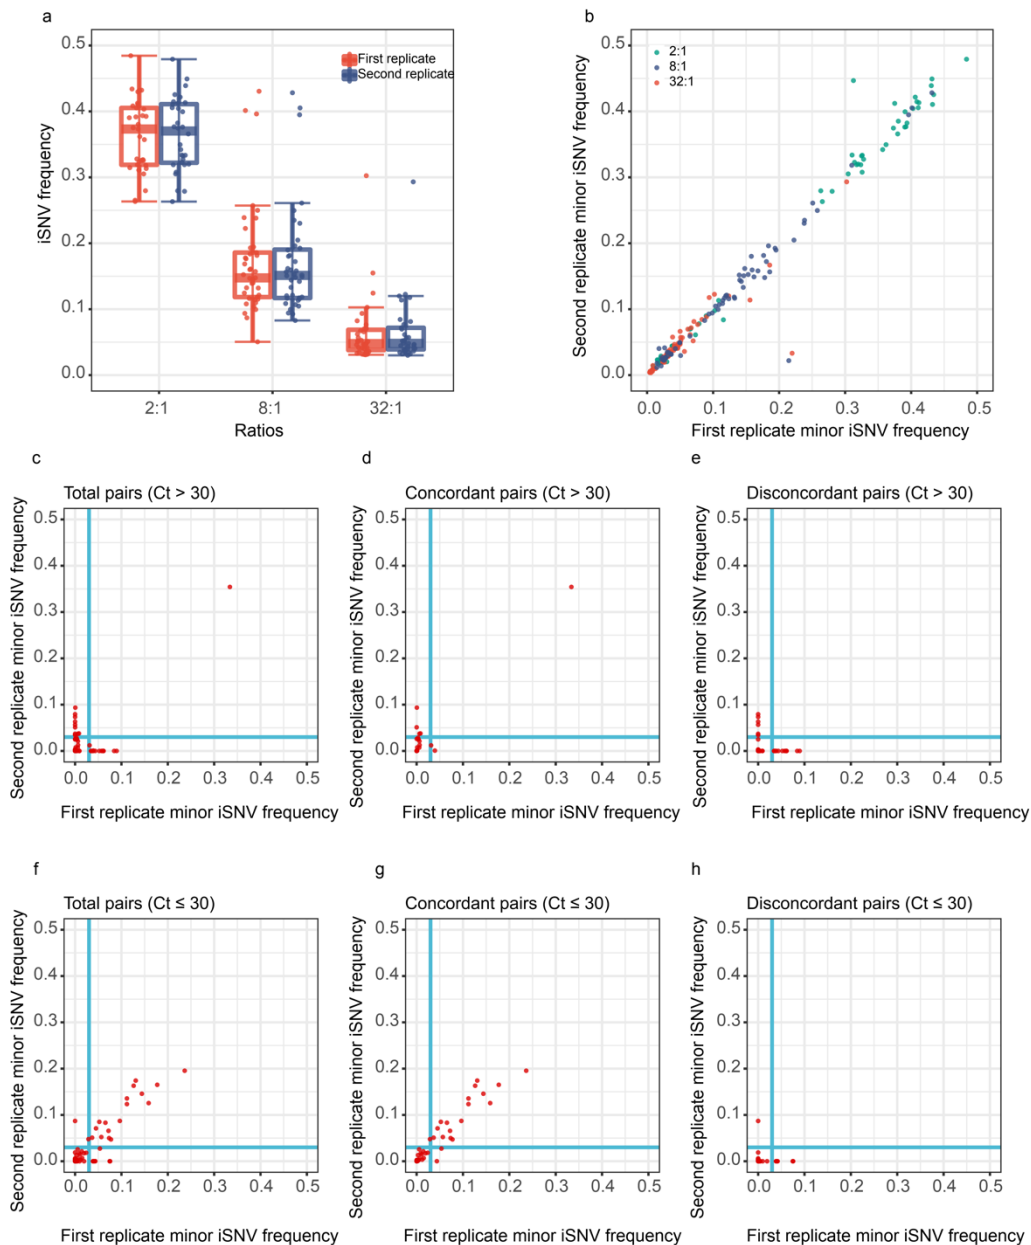

**Supplementary Figure 2.** The accuracy and reproducibility of calculating iSNVs frequency via multiplex PCR and high throughput sequencing. Two different viral lineage strains (B.1.351 and A) were first quantified by RT-PCR and mixed at different ratios 1:2, 1:8 and 1:32 which Ct (Cycle threshold) value for each group was ~20. We only included the sites which are variant between two inputted strains. **a** The points represent iSNVs frequency identified through multiplex PCR and high throughput sequencing. Box plots indicate the median (middle line), 25<sup>th</sup>, 75<sup>th</sup> percentile (box) and 5<sup>th</sup> and 95<sup>th</sup> percentile (whisker). The ratio for the minor iSNVs frequency in these variant sites were expected as 0.33, 0.11 and 0.03 according to the viral loads of the input strains. **b** The points represent the iSNVs in each of the replicate pairs. If MAFs are reproducible, we expect a positive correlation. **c-h** Fifteen replicate pairs were performed separate reverse transcription (RT), PCR

amplification, and library preparation steps. Results were shown with sequencing pairs  $Ct > 30$  (6 pairs, **c-e**) and  $Ct \leq 30$  (9 pairs, **f-h**), respectively. We included sites with alter frequency  $\geq 3\%$ , depth  $> 100$  and alter depth  $> 10$  in at least one of the 30 replicates. The points represent the iSNVs identified in all replicate pairs. If minor iSNVs are reproducible, we expect a positive correlation. The blue line shows 3% iSNVs frequency.

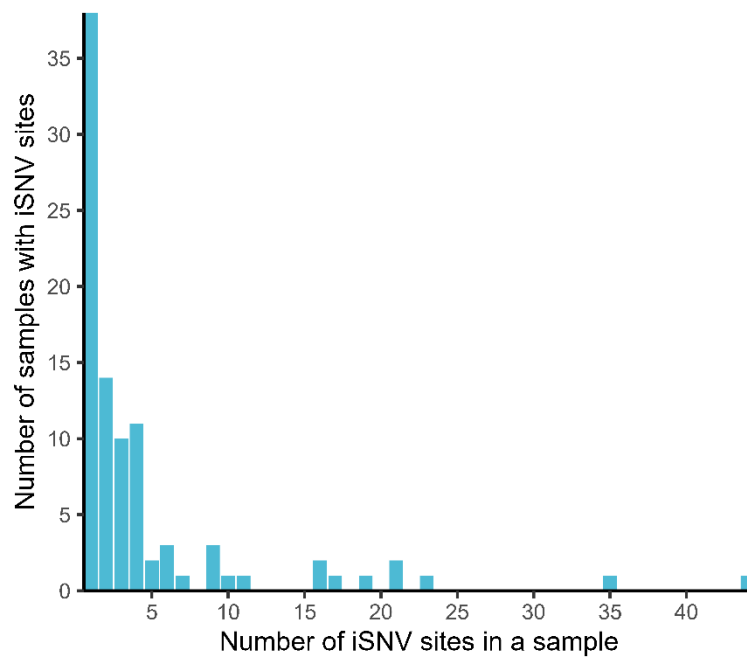

**Supplementary Figure 3.** Histogram of the number of samples (y-axis) by the number of minor iSNV per sample (x-axis),  $n = 93$ .

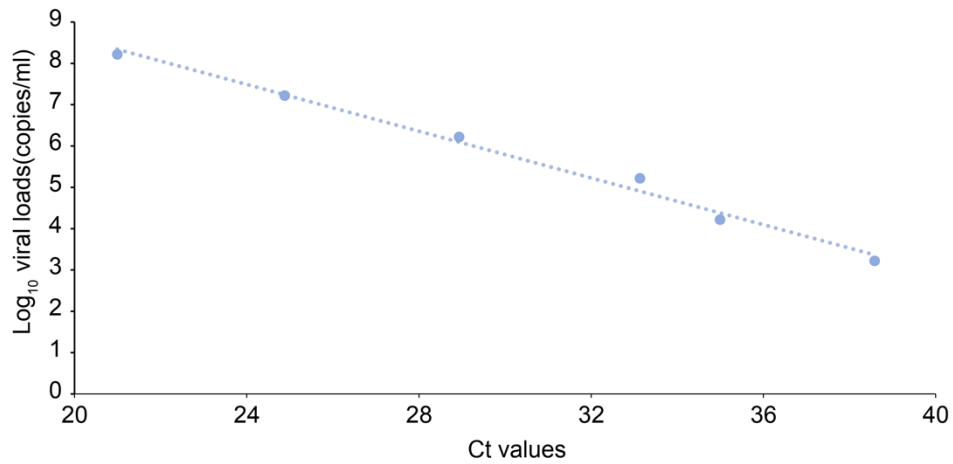

**Supplementary Figure 4.** Standard curve relationship between virus RNA copies and Ct values. The reference pseudovirus containing gene fragment of SARS-CoV-2 were serially diluted from  $1.67 \times 10^7$  to  $1.67 \times 10^3$  copies/mL. The viral RNA was extracted and evaluated in duplicate with RT-qPCR. The best-fit linear regression of the average Ct value on the  $\log_{10}$ -transformed standard values had slope  $-0.2829$  and intercept  $14.279$  ( $R^2 = 0.99$ ). The linear regression equation:  $y = -0.2829x + 14.279$ .

**Supplementary Table 1.** Ct values of first PCR+ test for cases in 2020 and 2021 epidemic

| Case_NO. | CT Value of first PCR+ test | Pangolin_Lineage | Epidemic |
|----------|-----------------------------|------------------|----------|
| SF200    | 29                          | B.57             | 2020     |
| SF117    | 25                          | A                | 2020     |
| SF012    | 36                          | A                | 2020     |
| SF013    | 35                          | A                | 2020     |
| SF5111   | 38                          | A                | 2020     |
| SF1153   | 36                          | B                | 2020     |
| SF273    | 36                          | B                | 2020     |
| SF028    | 31                          | B                | 2020     |
| SF1107   | 35                          | B                | 2020     |
| SF753    | 31                          | B                | 2020     |
| SF123    | 26                          | A                | 2020     |
| SF254    | 35                          | A                | 2020     |
| SF602    | 40                          | B                | 2020     |
| SF7617   | 35                          | B                | 2020     |
| SF629    | 33                          | B                | 2020     |
| SF014    | 35                          | B                | 2020     |
| SF025    | 36                          | A                | 2020     |
| SF315    | 35                          | B                | 2020     |
| SF401    | 33                          | B                | 2020     |
| SF040    | 30                          | B                | 2020     |
| SF1113   | 34                          | NA               | 2020     |
| SF1892   | 36                          | NA               | 2020     |
| SF3004   | 36                          | B                | 2020     |
| SF3006   | 30                          | A                | 2020     |
| SF4207   | 38                          | B                | 2020     |
| SF4320   | 39                          | NA               | 2020     |
| SF4204   | 36                          | A                | 2020     |
| SF4205   | 38                          | NA               | 2020     |
| SF12497  | 32                          | B                | 2020     |
| SF1136   | 19                          | B                | 2020     |
| SF115    | 33                          | A                | 2020     |
| SF665    | 23                          | B                | 2020     |
| SF1152   | 27                          | B                | 2020     |
| SF1159   | 33                          | B                | 2020     |
| SF812    | 35                          | B                | 2020     |
| SF3388   | 40                          | B                | 2020     |
| SF174    | 36                          | B                | 2020     |
| SF190    | 34                          | B                | 2020     |
| SF198    | 28                          | B                | 2020     |
| SF201    | 34                          | B                | 2020     |

NA: Not determined

**Supplementary Table 1.** Ct values of first PCR+ test for cases in 2020 and 2021 epidemic

| Case_NO. | CT Value of first PCR+ test | Pangolin_Lineage | Epidemic |
|----------|-----------------------------|------------------|----------|
| SF243    | 40                          | B                | 2020     |
| SF5286   | 40                          | B                | 2020     |
| SF1999   | 24                          | B                | 2020     |
| SF4631   | 35                          | B                | 2020     |
| SF2546   | 33                          | A                | 2020     |
| SF316    | 36                          | B                | 2020     |
| SF3646   | 36                          | A                | 2020     |
| SF4319   | 38                          | A                | 2020     |
| SF4047   | 33                          | A                | 2020     |
| SF4051   | 31                          | A                | 2020     |
| SF3646   | 34                          | A                | 2020     |
| SF616    | 31                          | B                | 2020     |
| SF630    | 38                          | B                | 2020     |
| SF5192   | 33                          | A                | 2020     |
| SF5187   | 32                          | A                | 2020     |
| SF632    | 35                          | B                | 2020     |
| SF7782   | 36                          | B                | 2020     |
| SF684    | 31                          | A                | 2020     |
| SF438    | 24                          | B                | 2020     |
| SF2074   | 35                          | B                | 2020     |
| SF1977   | 32                          | A                | 2020     |
| SF5106   | 34                          | B                | 2020     |
| SF5102   | 23                          | B                | 2020     |
| 5371     | 21                          | B.1.617.2        | 2021     |
| 5571     | 21                          | B.1.617.2        | 2021     |
| 5645     | 17                          | B.1.617.2        | 2021     |
| 5646     | 15                          | B.1.617.2        | 2021     |
| 5648     | 17                          | B.1.617.2        | 2021     |
| 5841     | 18                          | B.1.617.2        | 2021     |
| 5844     | 19                          | B.1.617.2        | 2021     |
| 5976     | 33                          | B.1.617.2        | 2021     |
| 5869     | 25                          | B.1.617.2        | 2021     |
| 5873     | 36                          | B.1.617.2        | 2021     |
| 5860     | 37                          | B.1.617.2        | 2021     |
| 5861     | 21                          | B.1.617.2        | 2021     |
| 5931     | 28                          | B.1.617.2        | 2021     |
| 6047     | 36                          | B.1.617.2        | 2021     |
| 6051     | 27                          | B.1.617.2        | 2021     |
| 5952     | 22                          | B.1.617.2        | 2021     |
| 6050     | 30                          | B.1.617.2        | 2021     |

NA: Not determined



**Supplementary Table 1.** Ct values of first PCR+ test for cases in 2020 and 2021 epidemic

| Case_NO. | CT Value of first PCR+ test | Pangolin_Lineage | Epidemic |
|----------|-----------------------------|------------------|----------|
| 6055     | 26                          | B.1.617.2        | 2021     |
| 5984     | 24                          | B.1.617.2        | 2021     |
| 5972     | 13                          | B.1.617.2        | 2021     |
| 5985     | 29                          | B.1.617.2        | 2021     |
| 6056     | 29                          | B.1.617.2        | 2021     |
| 6066     | 20                          | B.1.617.2        | 2021     |
| 5986     | 28                          | B.1.617.2        | 2021     |
| 5992     | 27                          | B.1.617.2        | 2021     |
| 5990     | 31                          | B.1.617.2        | 2021     |
| 5994     | 14                          | B.1.617.2        | 2021     |
| 6176     | 33                          | B.1.617.2        | 2021     |
| 6168     | 29                          | B.1.617.2        | 2021     |
| 6165     | 28                          | B.1.617.2        | 2021     |
| 6172     | 24                          | B.1.617.2        | 2021     |
| 6186     | 31                          | B.1.617.2        | 2021     |
| 6202     | 19                          | B.1.617.2        | 2021     |
| 6201     | 14                          | B.1.617.2        | 2021     |
| 6215     | 17                          | B.1.617.2        | 2021     |
| 6204     | 19                          | B.1.617.2        | 2021     |
| 6203     | 24                          | B.1.617.2        | 2021     |
| 6431     | 16                          | B.1.617.2        | 2021     |
| 6213     | 32                          | B.1.617.2        | 2021     |
| 6212     | 27                          | B.1.617.2        | 2021     |
| 6220     | 19                          | B.1.617.2        | 2021     |
| 6244     | 18                          | B.1.617.2        | 2021     |
| 6443     | 26                          | B.1.617.2        | 2021     |
| 6245     | 26                          | B.1.617.2        | 2021     |
| 6308     | 26                          | B.1.617.2        | 2021     |
| 6306     | 24                          | B.1.617.2        | 2021     |
| 6307     | 29                          | B.1.617.2        | 2021     |
| 6342     | 25                          | B.1.617.2        | 2021     |
| 6341     | 18                          | B.1.617.2        | 2021     |
| 6346     | 25                          | B.1.617.2        | 2021     |
| 6729     | 36                          | B.1.617.2        | 2021     |
| 6464     | 24                          | B.1.617.2        | 2021     |
| 8001     | 31                          | B.1.617.2        | 2021     |
| 6465     | 21                          | B.1.617.2        | 2021     |
| 6735     | 36                          | B.1.617.2        | 2021     |
| 8002     | 36                          | B.1.617.2        | 2021     |
| 6543     | 12                          | B.1.617.2        | 2021     |

NA: Not determined

**Supplementary Table 1.** Ct values of first PCR+ test for cases in 2020 and 2021 epidemic

| Case_NO. | CT Value of first PCR+ test | Pangolin_Lineage | Epidemic |
|----------|-----------------------------|------------------|----------|
| 6791     | 18                          | B.1.617.2        | 2021     |
| 6703     | 20                          | B.1.617.2        | 2021     |
| 8003     | 23                          | B.1.617.2        | 2021     |
| 6794     | 21                          | B.1.617.2        | 2021     |
| 6934     | 21                          | B.1.617.2        | 2021     |

NA: Not determined

**Supplementary Table 2. iSNV pair transmission**

| Transmission_pairs | Donor | iSNVs<br>(Donor) | Recipient | iSNVs<br>(Recipient) | Transmitted iSNVs* |
|--------------------|-------|------------------|-----------|----------------------|--------------------|
| pair 1             | 5137  | 3                | 5571      | 2                    | 1                  |
| pair 2             | 5137  | 3                | 5371      | 2                    | 1                  |
| pair 3             | 5137  | 3                | 5645      | 1                    | 1                  |
| pair 4             | 6173  | 19               | 6196      | 3                    | 0                  |
| pair 5             | 5647  | 1                | 5841      | 2                    | 0                  |
| pair 6             | 5647  | 1                | 5976      | 3                    | 0                  |
| pair 7             | 5647  | 1                | 6047      | 0                    | 0                  |
| pair 8             | 5647  | 1                | 5869      | 44                   | 0                  |
| pair 9             | 5646  | 1                | 5869      | 44                   | 0                  |
| pair 10            | 5646  | 1                | 5844      | 0                    | 0                  |
| pair 11            | 5943  | 21               | 5945      | 2                    | 0                  |
| pair 12            | 6056  | 3                | 6066      | 5                    | 0                  |
| pair 13            | 6056  | 3                | 6367      | 0                    | 0                  |
| pair 14            | 5943  | 21               | 5984      | 0                    | 0                  |
| pair 15            | 5943  | 21               | 5990      | 4                    | 0                  |
| pair 16            | 5943  | 21               | 6055      | 1                    | 0                  |
| pair 17            | 5943  | 21               | 5986      | 21                   | 0                  |
| pair 18            | 5943  | 21               | 5947      | 3                    | 0                  |
| pair 19            | 5943  | 21               | 5851      | 0                    | 0                  |
| pair 20            | 5943  | 21               | 5859      | 0                    | 0                  |
| pair 21            | 6056  | 3                | 5984      | 0                    | 0                  |
| pair 22            | 6056  | 3                | 5990      | 4                    | 0                  |
| pair 23            | 6056  | 3                | 6055      | 1                    | 0                  |
| pair 24            | 6056  | 3                | 5986      | 21                   | 0                  |
| pair 25            | 6056  | 3                | 5947      | 3                    | 0                  |
| pair 26            | 6056  | 3                | 5851      | 0                    | 0                  |
| pair 27            | 6056  | 3                | 5859      | 0                    | 0                  |
| pair 28            | 5843  | 1                | 6051      | 0                    | 0                  |
| pair 29            | 5843  | 1                | 6190      | 1                    | 0                  |
| pair 30            | 5843  | 1                | 6174      | 5                    | 0                  |
| pair 31            | 5843  | 1                | 6169      | 7                    | 0                  |
| pair 32            | 5843  | 1                | 6175      | 1                    | 0                  |
| pair 33            | 5843  | 1                | 6201      | 0                    | 0                  |
| pair 34            | 5843  | 1                | 6202      | 3                    | 0                  |
| pair 35            | 5843  | 1                | 6205      | 3                    | 0                  |
| pair 36            | 5843  | 1                | 6240      | 0                    | 0                  |
| pair 37            | 5843  | 1                | 6171      | 0                    | 0                  |
| pair 38            | 5843  | 1                | 5989      | 2                    | 0                  |
| pair 39            | 5843  | 1                | 5993      | 1                    | 0                  |
| pair 40            | 5843  | 1                | 6304      | 4                    | 0                  |

\* Donor iSNVs could not be found in recipient.

**Supplementary Table 2. iSNV pair transmission**

| Transmission_pairs | Donor | iSNVs<br>(Donor) | Recipient | iSNVs<br>(Recipient) | Transmitted iSNVs* |
|--------------------|-------|------------------|-----------|----------------------|--------------------|
| pair 41            | 5843  | 1                | 6305      | 1                    | 0                  |
| pair 42            | 5843  | 1                | 6484      | 2                    | 0                  |
| pair 43            | 5869  | 44               | 6200      | 2                    | 0                  |
| pair 44            | 6174  | 5                | 6212      | 1                    | 0                  |
| pair 45            | 5989  | 1                | 6191      | 3                    | 1                  |
| pair 46            | 5989  | 1                | 6300      | 4                    | 0                  |
| pair 47            | 5993  | 1                | 6300      | 4                    | 0                  |
| pair 48            | 6304  | 4                | 6307      | 2                    | 0                  |
| pair 49            | 6304  | 4                | 6306      | 3                    | 0                  |
| pair 50            | 6305  | 1                | 6307      | 2                    | 0                  |
| pair 51            | 6305  | 1                | 6306      | 3                    | 0                  |
| pair 52            | 6484  | 2                | 6666      | 0                    | 0                  |
| pair 53            | 6217  | 1                | 6220      | 2                    | 0                  |
| pair 54            | 6244  | 1                | 6483      | 1                    | 0                  |
| pair 55            | 6245  | 1                | 6465      | 3                    | 0                  |
| pair 56            | 6244  | 1                | 6547      | 4                    | 0                  |
| pair 57            | 6241  | 3                | 6547      | 4                    | 0                  |
| pair 58            | 6245  | 1                | 6547      | 4                    | 0                  |
| pair 59            | 6300  | 4                | 6292      | 1                    | 0                  |
| pair 60            | 6300  | 4                | 6338      | 3                    | 0                  |

\* Donor iSNVs could not be found in recipient.
