# Supplementary material for: Viral infection and transmission in a large, well-traced outbreak caused by the SARS-CoV-2 Delta variant
Source: PubMed Central journal article supplement (PMC8786931; doi:10.1038/s41467-022-28089-y), 2022-01-24
Supplement: 41467_2022_28089_MOESM3_ESM.pdf [file 41467_2022_28089_MOESM3_ESM.pdf]

## **Description of Additional Supplementary Files**

File Name: Supplementary Data 1

Description: Longitudinal PCR testing were performed on 813 oropharyngeal swabs from 46 individuals, ranging from the first PCR+ till the clearance of viruses.
